# Supplementary material for: Bioprocess-inspired synthesis of multilayered chitosan/CaCO3composites with nacre-like structures and high mechanical properties
Source: Royal Society of Chemistry journal article supplement (doi:10.1039/d1tb01061a), 2021-01-01
Supplement: d1tb01061a1.pdf [file d1tb01061a1.pdf]

## Supporting Information

### **Bioprocess-inspired synthesis of multilayered chitosan/CaCO<sub>3</sub> composites with nacre-like structures and high mechanical properties**

Yidi Li,<sup>a</sup> Hang Ping,<sup>a</sup> Zhaoyong Zou,<sup>a</sup> Jingjing Xie,<sup>a</sup> Weimin Wang,<sup>a</sup> and Kun Wang\*,<sup>b</sup> Zhengyi Fu\*\*<sup>a</sup>

a. State Key Laboratory of Advanced Technology for Materials Synthesis and Processing, Wuhan University of Technology, Luoshi Road No. 122, Wuhan, 430070, China. E-mail: zyfu@whut.edu.cn; kun.wang@whut.edu.cn

b. State Key Laboratory of Silicate Materials for Architectures, Wuhan University of Technology, 122 Luoshi Road, Wuhan, P. R. China

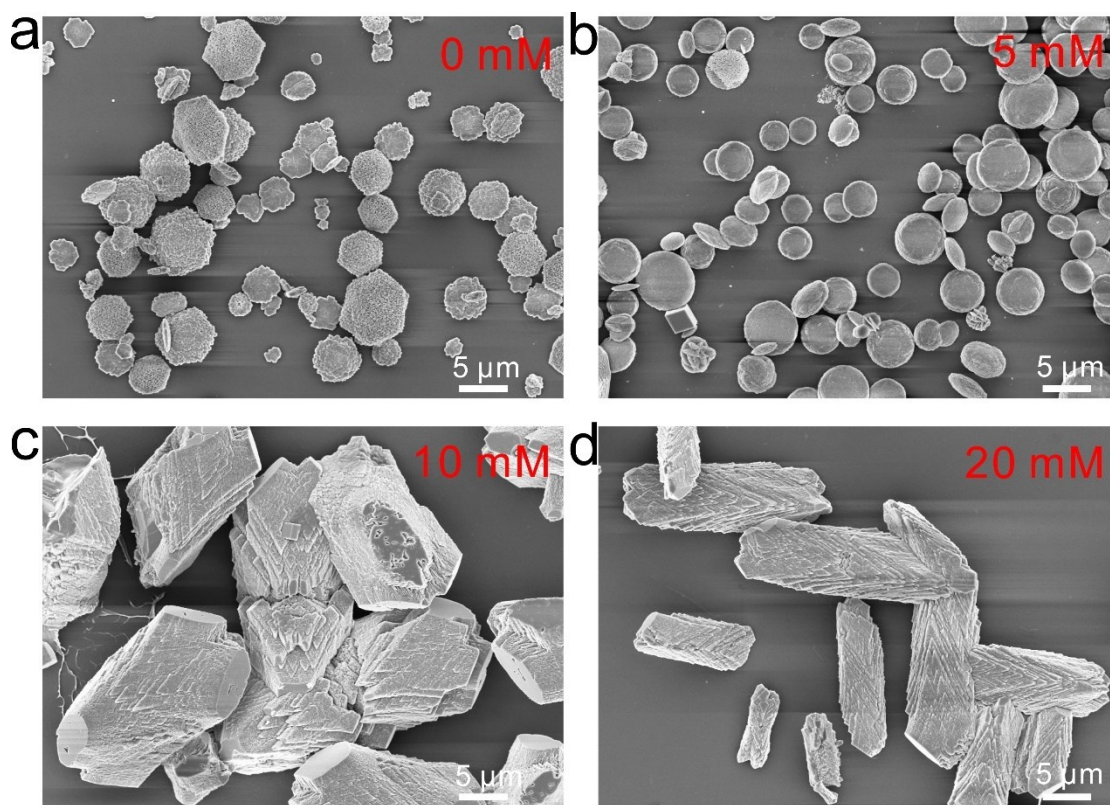

**Figure S1.** SEM images of  $\text{CaCO}_3$  films obtained at different concentration of  $\text{Mg}^{2+}$  a) 0 mM; b) 5 mM; c) 10 mM; d) 20 mM.

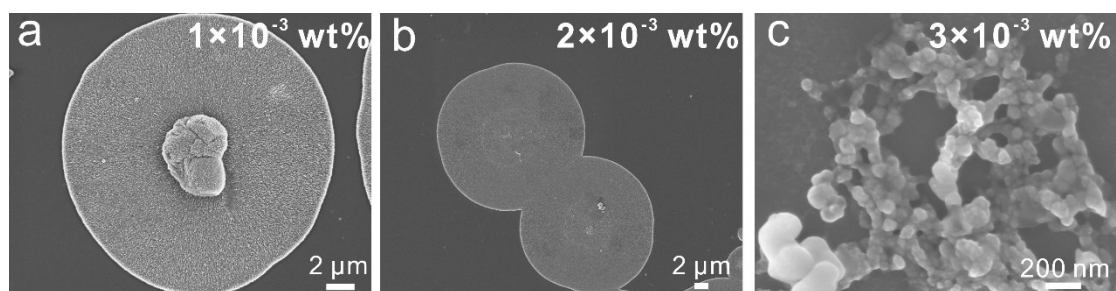

**Figure S2.**  $\text{CaCO}_3$  films obtained at different concentrations of PAA.

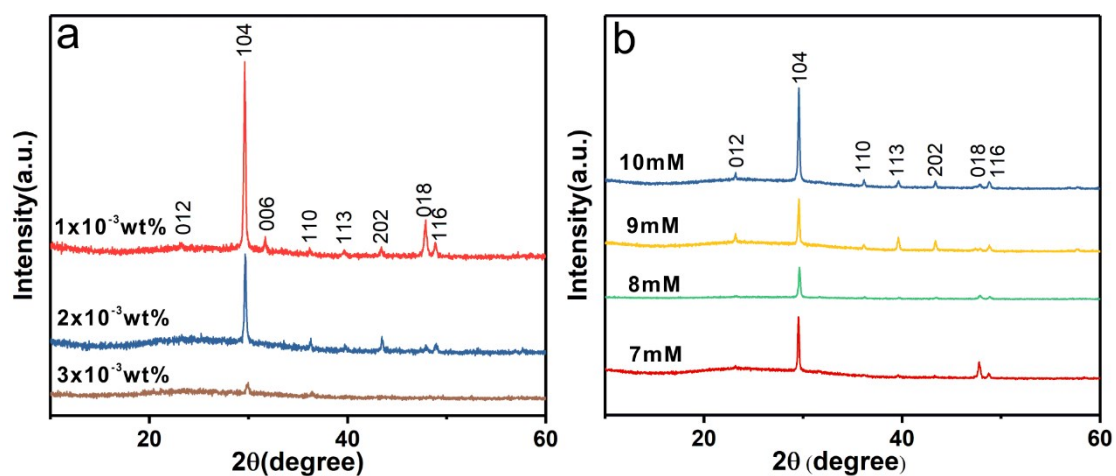

**Figure S3.** a) XRD patterns of  $\text{CaCO}_3$  films obtained at different concentrations of PAA. b) XRD patterns of  $\text{CaCO}_3$  films obtained at different concentrations of  $\text{Mg}^{2+}$  with  $2 \times 10^{-3}$  wt% PAA.

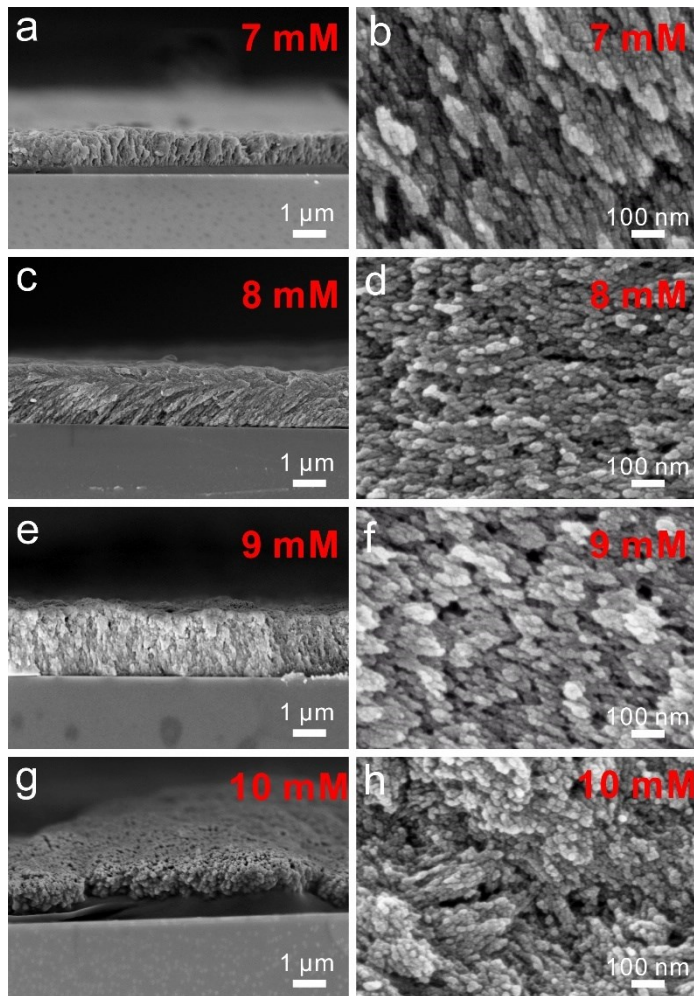

**Figure S4.**  $\text{CaCO}_3$  films obtained at different concentrations of  $\text{Mg}^{2+}$  with  $2 \times 10^{-3}$  wt% PAA.

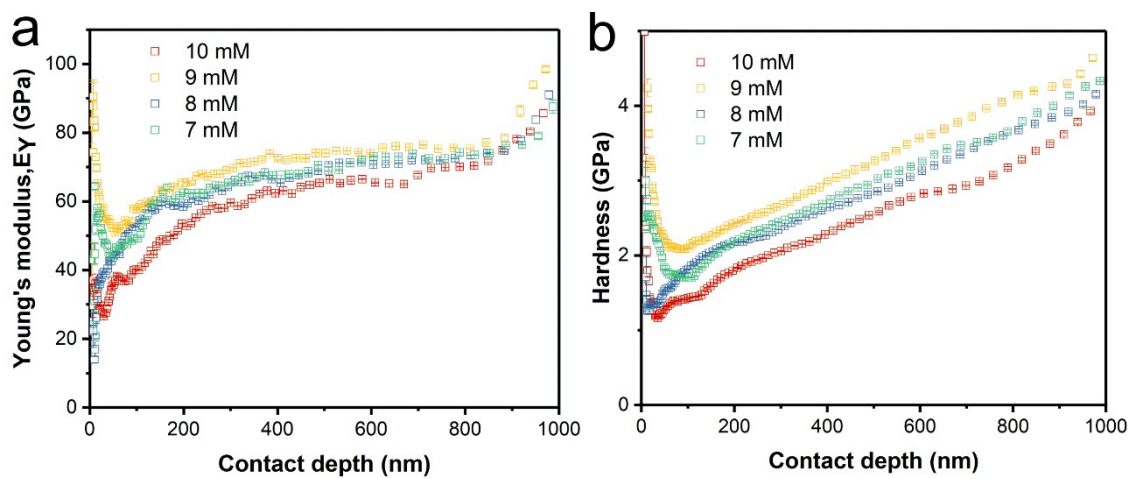

**Figure S5.** Mechanical properties of  $\text{CaCO}_3$  films obtained at different concentrations of  $\text{Mg}^{2+}$  with  $2 \times 10^{-3}$  wt% PAA. a) Young's modulus-displacement curves. b) Hardness-displacement curves.

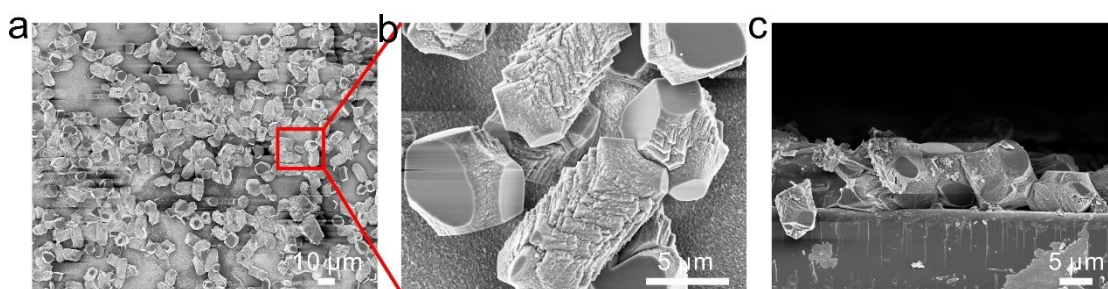

**Figure S6.** Scanning electron microscopy (SEM) images of mineralization directly on  $(\text{CS}/\text{CaCO}_3)_1$  without spin-coating CS films.

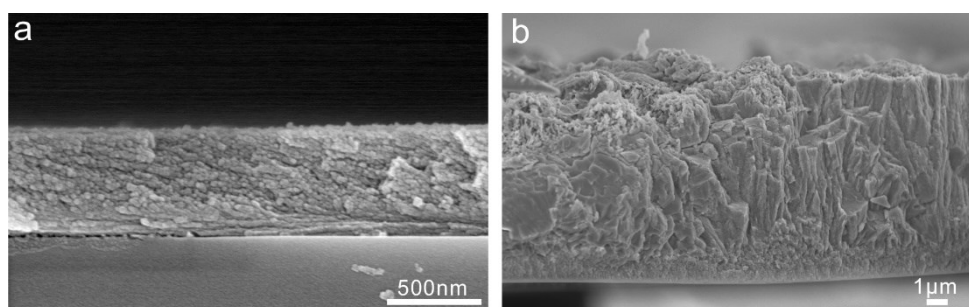

**Figure S7.** Mineralization at different dripping velocities. a) mineralization for 12 h at a dripping velocity of  $4.16 \text{ mL h}^{-1}$ . b) mineralization for 72 h at a dripping velocity of  $0.69 \text{ mL h}^{-1}$ .

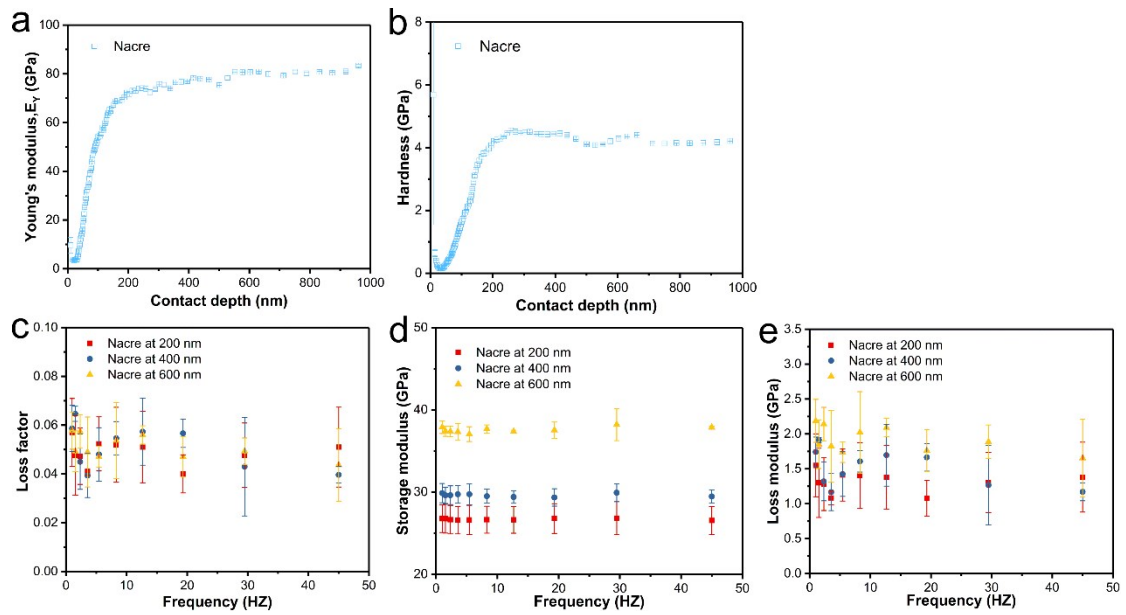

**Figure S8.** Mechanical properties of natural nacre tested by nanoindentation. a) Young's modulus-displacement curves. b) Hardness-displacement curves. c) Loss factor-frequency scatter plots. d) Storage modulus-frequency scatter plots. e) Loss modulus-frequency scatter plots.

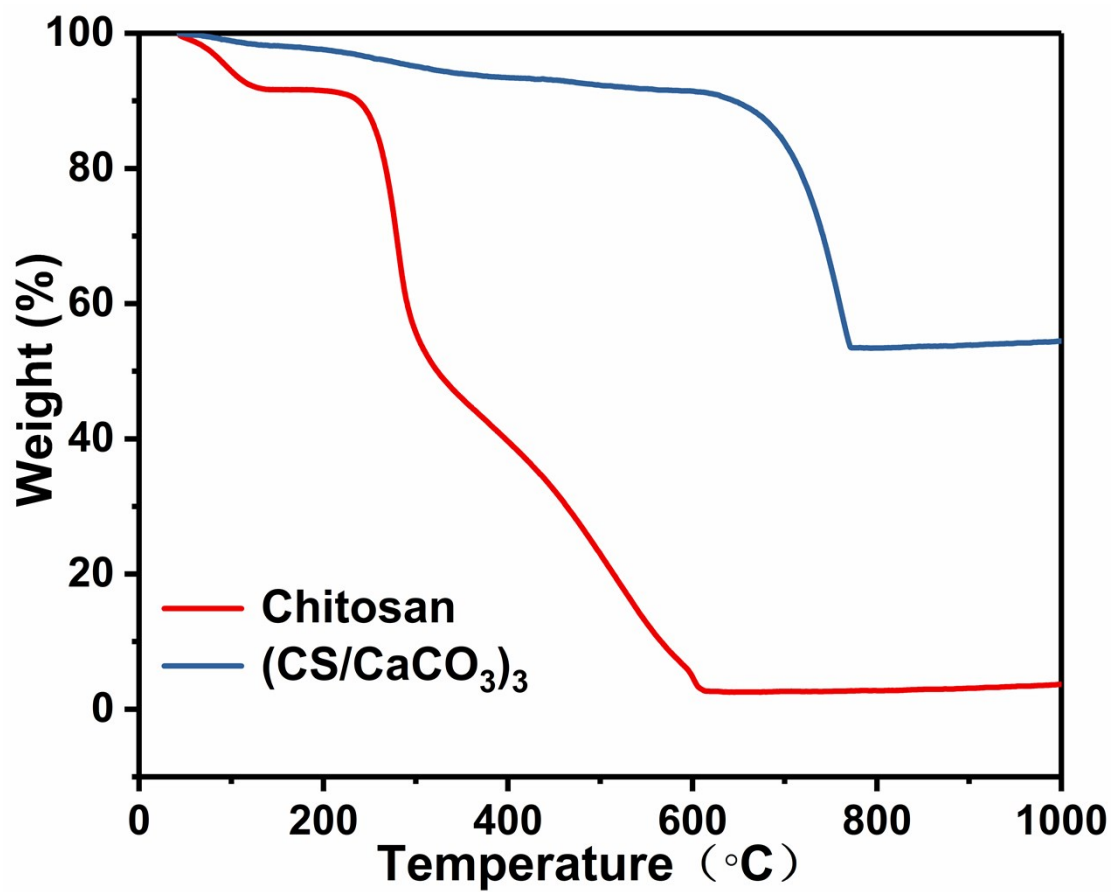

Figure S9. TGA data for the synthetic (CS/CaCO<sub>3</sub>)<sub>3</sub> and chitosan.

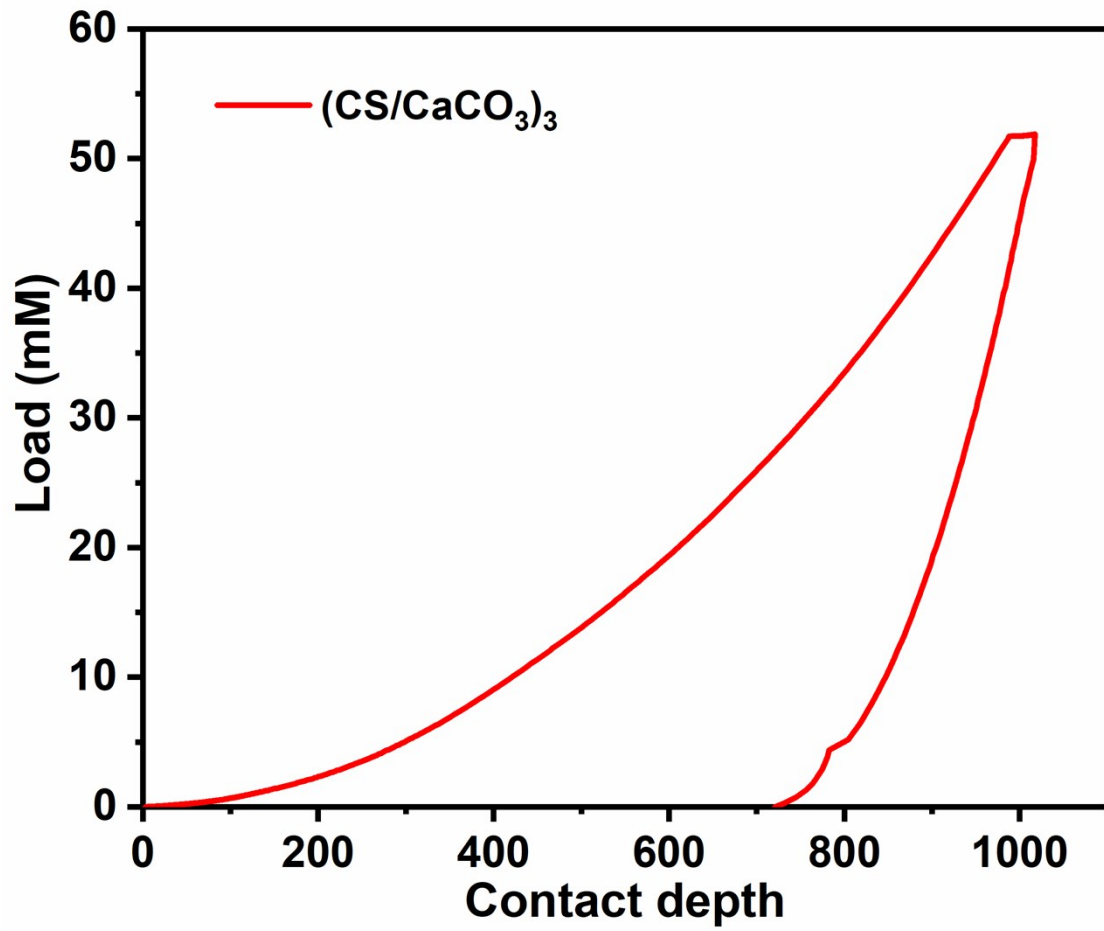

Figure S10. Load-displacement curves for  $(\text{CS}/\text{CaCO}_3)_3$ .
